# Supplementary material
Source: PubMed Central journal article supplement (PMC7315782)

## Supplementary Online Content

Halpern SD, Small DS, Troxel AB, et al. Effect of default options in advance directives on hospital-free days and care choices among seriously ill patients: a randomized clinical trial. *JAMA Netw Open*. 2020;3(3):e201742.  
doi:10.1001/jamanetworkopen.2020.1742

### **eAppendix.** Advance Directives Tested

**eTable 1.** Differences Among the 3 Versions of the Advance Directive

**eTable 2.** Comparison of Patients Who Were and Were Not in the Per-Protocol Sample

**eTable 3.** Changes to Choices for Goals of Care and for Life Support at Debriefing and During Follow-up

**eTable 4.** Comparison of Patients Who Did and Did Not Provide Valid Social Security Numbers

**eTable 5.** Regression Analysis of Hospital-Free Days, Measured Outcomes Only

**eTable 6.** Regression Analysis of Hospital-Free Days, Missing Outcomes Imputed

**eTable 7.** Complier Average Treatment Effect Analysis of Hospital-Free Days

**eTable 8.** Regression Analysis of Receipt of at Least 1 Form of Life Support

**eTable 9.** Regression Analysis of Death in a Hospital vs Death Elsewhere or Alive

**eTable 10.** Distributions of Patients Whose Completed ADs Were Scanned in the Electronic Health Record

**eTable 11.** Choices and Outcomes Among Patients in the Per-Protocol Sample

**eTable 12.** Regression Analysis of McGill Quality of Life Score

**eFigure 1.** Flow of Patient Accrual and Protocol Completion

**eFigure 2.** Proportions of Patients Choosing to Forgo Each Form of Life Support by Trial Group, Per-Protocol Sample

**eFigure 3.** Proportions of Patients Choosing to Forgo Each Form of Life Support by Trial Group, Modified Intention-to-Treat Sample

This supplementary material has been provided by the authors to give readers additional information about their work.

## eAppendix. Advance Directives Tested

### Standard advance directive A

#### Part I – Durable Healthcare Power of Attorney

I, \_\_\_\_\_ of \_\_\_\_\_ County, \_\_\_\_\_ (State), appoint the person named below to be my agent to make health decisions for me **when and only when I lack sufficient capacity to make or communicate a choice regarding a healthcare decision** as verified by my attending physician. My agent may not delegate the authority to make decisions.

#### Appointment of Healthcare Agent (“Agent”)

I appoint the following agent:

Name: \_\_\_\_\_ Relationship: \_\_\_\_\_

Address: \_\_\_\_\_  
\_\_\_\_\_

Telephone Number: Home \_\_\_\_\_ Work \_\_\_\_\_

Email: \_\_\_\_\_

Alternate agent (to be contacted if the appointed agent is unable to serve):

Name: \_\_\_\_\_ Relationship: \_\_\_\_\_

Telephone Number: Home \_\_\_\_\_ Work \_\_\_\_\_

Email: \_\_\_\_\_

**I understand that if I do not name an agent, my healthcare providers will ask my family or others who may know my preferences and values for help in determining my wishes for treatment.**

\_\_\_\_\_(initial) I do not wish to appoint an agent.

**Part II - Healthcare Treatment Instructions (Living Will)**

The following healthcare treatment instructions exercise my right to make my own healthcare decisions. These instructions are intended to provide clear and convincing evidence of my wishes, and are to be followed only when I lack the ability to understand, make or communicate healthcare decisions for myself. Further, these wishes are only intended to apply if I am in a **state of permanent unconsciousness or have an end-stage medical condition** as verified by my attending physician.

In general, I wish to both live as long as possible and avoid pain and suffering. However, I understand that in some situations, choosing between these two goals may be necessary. If I am in a situation where such a choice is needed:

**Overall Goals of Care**

\_\_\_\_\_ I want my healthcare providers to treat me by helping to relieve my pain and suffering, even if that means that I may not live as long.

*If you prefer to choose a different overall goal of care, cross out the lines above and place your initials by one of the other options below:*

\_\_\_\_\_ I want my healthcare providers to treat me by helping me to live as long as possible, even if that means that I may have more pain or suffering.

**OR**

\_\_\_\_\_ I do not want to specify one of the above goals. My agent, with consultation from my healthcare provider, may direct the overall goals of my care based on his or her assessment of my preferences and values or best interests.

In addition, I want my healthcare providers and agent to focus on the following goals (optional):

---

---

## Specific Procedures

These are my specific requests regarding life-prolonging procedures, in addition to requests I may write in at the end of this section.

### 1. Cardiopulmonary resuscitation (CPR)

\_\_\_\_\_ I do not want cardiopulmonary resuscitation (CPR) to be performed on me if my heart stops beating, even if performing CPR might prolong my life.

*If you prefer to choose a different option, cross out the lines above and place your initials by one of the other options below:*

\_\_\_\_\_ I request cardiopulmonary resuscitation (CPR) if my heart stops beating, even if performing CPR may increase my pain or suffering.

**OR**

\_\_\_\_\_ I do not wish to specify one of these options. My agent, with consultation from my healthcare provider, may make any decisions about cardiopulmonary resuscitation (CPR) for me based on his or her assessment of my preferences and values or best interests.

### 2. Mechanical ventilator (breathing machine) use

\_\_\_\_\_ I do not want to be placed on a mechanical ventilator even if it might prolong my life. If I am unable to breathe on my own, I would prefer care directed towards relief of pain and suffering.

*If you prefer to choose a different option, cross out the lines above and place your initials by one of the other options below:*

\_\_\_\_\_ I wish to be placed on a mechanical ventilator (breathing machine) if it may prolong my life, even if it may also increase my pain or suffering.

**OR**

\_\_\_\_\_ I do not wish to specify one of these options. My agent, with consultation from my healthcare provider, may make any decisions about mechanical ventilator use for me based on his or her assessment of my preferences and values or best interests.

### 3. Dialysis (kidney filtration by machine)

\_\_\_\_\_ I do not want dialysis to be performed on me, even if dialysis might prolong my life. If I was on dialysis before I became permanently unconscious or developed an end-stage medical condition, I want dialysis to be stopped.

*If you prefer to choose a different option, cross out the lines above and place your initials by one of the other options below:*

\_\_\_\_\_ I request dialysis if it may prolong my life, even if it may also increase my pain or suffering. This includes continuing dialysis if I was on it before I became permanently unconscious or developed an end-stage medical condition.

**OR**

\_\_\_\_\_ I do not wish to specify one of these options. My agent, with consultation from my healthcare provider, may make decisions about the use of dialysis for me based on his or her assessment of my preferences and values or best interests.

**4. Feeding tube insertion for artificial nutrition and hydration**

\_\_\_\_\_ I do not want to have a feeding tube inserted or used for artificial nutrition and hydration.

*If you prefer to choose a different option, cross out the lines above and place your initials by one of the other options below:*

\_\_\_\_\_ I request feeding tube insertion and use for artificial nutrition and hydration if I cannot eat or drink.

**OR**

\_\_\_\_\_ I do not wish to specify one of these options. I understand that if I do not clearly express my preferences, my agent will presume that I want artificial nutrition and hydration.

In addition, I make the following requests regarding whether or not to use specific therapies:

---

---

---

**Care on hospital discharge if I am in an end-stage medical condition**

These are my requests about how I wish to be cared for if I am in a hospital, my doctors say I no longer need to be in the hospital, but I cannot communicate and my doctors do not expect that to change.

\_\_\_\_\_ I want to be sent to my home if possible, or otherwise to a facility near my home, to receive care focused on keeping me as comfortable as possible rather than on prolonging my life. If my condition worsens, I do not want to return to a hospital again.

*If you prefer to choose a different option, cross out the lines above and place your initials by one of the other options below:*

\_\_\_\_\_ I want to be sent to my home if possible, or otherwise to a facility near my home, to receive care focused on keeping me alive as long as possible. If my condition worsens, I want to return to the hospital if that may prolong my life.

**OR**

\_\_\_\_\_ I do not wish to specify one of these options. I understand that if I do not express my preferences, my agent, with consultation from my health care provider, will make this decision for me based on his or her assessment of my preferences and values or best interests.

**Agent’s Use of Instructions (Initial one option only)**

\_\_\_\_\_ I want the preferences I have expressed in this Living Will to be strictly followed by my agent.

**OR**

\_\_\_\_\_ I want the preferences I have expressed in this Living Will to serve as a general guide for my agent. My agent will have final say about all decisions, and may override these instructions.

Please indicate any exceptions to the above – that is, instructions that may not be overridden:

---

---

If I did not appoint an agent, these instructions shall be followed.

**Legal Protection**

Pennsylvania law protects my healthcare agent and healthcare providers from any legal liability for their good faith actions in following my wishes as expressed in this form or in complying with my healthcare agent's direction. On behalf of myself, my executors and heirs, I further hold my healthcare agent and my healthcare providers harmless and indemnify them against any claim for their good faith actions in recognizing my healthcare agent's authority or in following my treatment instructions.

Having carefully read this document, I have signed it this \_\_\_\_ day of \_\_\_\_\_, 20\_\_, revoking all previous healthcare powers of attorney and healthcare treatment instructions.

**SIGNED:** \_\_\_\_\_  
(SIGN FULL NAME HERE)

*Two witnesses at least 18 years of age are required by Pennsylvania law and should witness your signature in each other's presence. A person who signs this document on behalf of and at the direction of a principal may not be a witness. (It is preferable if the witnesses are not your heirs, nor your creditors, nor employed by any of your healthcare providers.)*

WITNESS: \_\_\_\_\_

WITNESS: \_\_\_\_\_

**Standard advance directive B**

**Part I – Durable Healthcare Power of Attorney**

I, \_\_\_\_\_ of \_\_\_\_\_ County, \_\_\_\_\_ (State), appoint the person named below to be my agent to make health decisions for me **when and only when I lack sufficient capacity to make or communicate a choice regarding a healthcare decision** as verified by my attending physician. My agent may not delegate the authority to make decisions.

**Appointment of Healthcare Agent (“Agent”)**

I appoint the following agent:

Name: \_\_\_\_\_ Relationship: \_\_\_\_\_

Address: \_\_\_\_\_  
\_\_\_\_\_

Telephone Number: Home \_\_\_\_\_ Work \_\_\_\_\_

Email: \_\_\_\_\_

Alternate agent (to be contacted if the appointed agent is unable to serve):

Name: \_\_\_\_\_ Relationship: \_\_\_\_\_

Telephone Number: Home \_\_\_\_\_ Work \_\_\_\_\_

Email: \_\_\_\_\_

**I understand that if I do not name an agent, my healthcare providers will ask my family or others who may know my preferences and values for help in determining my wishes for treatment.**

\_\_\_\_\_ (*initial*) I do not wish to appoint an agent.

## Part II - Healthcare Treatment Instructions (Living Will)

The following healthcare treatment instructions exercise my right to make my own healthcare decisions. These instructions are intended to provide clear and convincing evidence of my wishes, and are to be followed only when I lack the ability to understand, make or communicate healthcare decisions for myself. Further, these wishes are only intended to apply if I am in a **state of permanent unconsciousness or have an end-stage medical condition** as verified by my attending physician.

In general, I wish to both live as long as possible and avoid pain and suffering. However, I understand that in some situations, choosing between these two goals may be necessary. If I am in a situation where such a choice is needed:

### Overall Goals of Care

\_\_\_\_\_ I want my healthcare providers to treat me by helping me to live as long as possible, even if that means that I may have more pain or suffering.

*If you prefer to choose a different overall goal of care, cross out the lines above and place your initials by one of the other options below:*

\_\_\_\_\_ I want my healthcare providers to treat me by helping to relieve my pain and suffering, even if that means that I may not live as long.

**OR**

\_\_\_\_\_ I do not want to specify one of the above goals. My agent, with consultation from my healthcare provider, may direct the overall goals of my care based on his or her assessment of my preferences and values or best interests.

In addition, I want my healthcare providers and agent to focus on the following goals (optional):

\_\_\_\_\_  
\_\_\_\_\_



## Specific Procedures

These are my specific requests regarding life-prolonging procedures, in addition to requests I may write in at the end of this section.

### 1. Cardiopulmonary resuscitation (CPR)

\_\_\_\_\_ I request cardiopulmonary resuscitation (CPR) if my heart stops beating, even if performing CPR may increase my pain or suffering.

*If you prefer to choose a different option, cross out the lines above and place your initials by one of the other options below:*

\_\_\_\_\_ I do not want cardiopulmonary resuscitation (CPR) to be performed on me if my heart stops beating, even if performing CPR might prolong my life.

**OR**

\_\_\_\_\_ I do not wish to specify one of these options. My agent, with consultation from my healthcare provider, may make any decisions about cardiopulmonary resuscitation (CPR) for me based on his or her assessment of my preferences and values or best interests.

### 2. Mechanical ventilator (breathing machine) use

\_\_\_\_\_ I wish to be placed on a mechanical ventilator (breathing machine) if it may prolong my life, even if it may also increase my pain or suffering.

*If you prefer to choose a different option, cross out the lines above and place your initials by one of the other options below:*

\_\_\_\_\_ I do not want to be placed on a mechanical ventilator even if it might prolong my life. If I am unable to breathe on my own, I would prefer care directed towards relief of pain and suffering.

**OR**

\_\_\_\_\_ I do not wish to specify one of these options. My agent, with consultation from my healthcare provider, may make any decisions about mechanical ventilator use for me based on his or her assessment of my preferences and values or best interests.

### 3. Dialysis (kidney filtration by machine)

\_\_\_\_\_ I request dialysis if it may prolong my life, even if it may also increase my pain or suffering. This includes continuing dialysis if I was on it before I became permanently unconscious or developed an end-stage medical condition.

*If you prefer to choose a different option, cross out the lines above and place your initials by one of the other options below:*

\_\_\_\_\_ I do not want dialysis to be performed on me, even if dialysis might prolong my life. If I was on dialysis before I became permanently unconscious or developed an end-stage medical condition, I want dialysis to be stopped.

**OR**

\_\_\_\_\_ I do not wish to specify one of these options. My agent, with consultation from my healthcare provider, may make decisions about the use of dialysis for me based on his or her assessment of my preferences and values or best interests.

**4. Feeding tube insertion for artificial nutrition and hydration**

\_\_\_\_\_ I request feeding tube insertion and use for artificial nutrition and hydration if I cannot eat or drink

*If you prefer to choose a different option, cross out the lines above and place your initials by one of the other options below:*

\_\_\_\_\_ I do not want to have a feeding tube inserted or used for artificial nutrition and hydration.

**OR**

\_\_\_\_\_ I do not wish to specify one of these options. I understand that if I do not clearly express my preferences, my agent will presume that I want artificial nutrition and hydration.

In addition, I make the following requests regarding whether or not to use specific therapies:

---

---

---

**Care on hospital discharge if I am in an end-stage medical condition**

These are my requests about how I wish to be cared for if I am in a hospital, my doctors say I no longer need to be in the hospital, but I cannot communicate and my doctors do not expect that to change.

\_\_\_\_\_ I want to be sent to my home if possible, or otherwise to a facility near my home, to receive care focused on keeping me alive as long as possible. If my condition worsens, I want to return to the hospital if that may prolong my life.

*If you prefer to choose a different option, cross out the lines above and place your initials by one of the other options below:*

\_\_\_\_\_ I want to be sent to my home if possible, or otherwise to a facility near my home, to receive care focused on keeping me as comfortable as possible rather than on prolonging my life. If my condition worsens, I do not want to return to a hospital again.

**OR**

\_\_\_\_\_ I do not wish to specify one of these options. I understand that if I do not express my preferences, my agent, with consultation from my health care provider, will make this decision for me based on his or her assessment of my preferences and values or best interests.

**Agent’s Use of Instructions (Initial one option only)**

\_\_\_\_\_ I want the preferences I have expressed in this Living Will to be strictly followed by my agent.

**OR**

\_\_\_\_\_ I want the preferences I have expressed in this Living Will to serve as a general guide for my agent. My agent will have final say about all decisions, and may override these instructions.

Please indicate any exceptions to the above – that is, instructions that may not be overridden:

---

---

If I did not appoint an agent, these instructions shall be followed.

**Legal Protection**

Pennsylvania law protects my healthcare agent and healthcare providers from any legal liability for their good faith actions in following my wishes as expressed in this form or in complying with my healthcare agent's direction. On behalf of myself, my executors and heirs, I further hold my healthcare agent and my healthcare providers harmless and indemnify them against any claim for their good faith actions in recognizing my healthcare agent's authority or in following my treatment instructions.

Having carefully read this document, I have signed it this \_\_\_\_ day of \_\_\_\_\_, 20\_\_, revoking all previous healthcare powers of attorney and healthcare treatment instructions.

**SIGNED:** \_\_\_\_\_  
(SIGN FULL NAME HERE)

*Two witnesses at least 18 years of age are required by Pennsylvania law and should witness your signature in each other's presence. A person who signs this document on behalf of and at the direction of a principal may not be a witness. (It is preferable if the witnesses are not your heirs, nor your creditors, nor employed by any of your healthcare providers.)*

WITNESS: \_\_\_\_\_

WITNESS: \_\_\_\_\_

**Comfort default advance directive**

**Part I – Durable Healthcare Power of Attorney**

I, \_\_\_\_\_ of \_\_\_\_\_ County, \_\_\_\_\_ (State), appoint the person named below to be my agent to make health decisions for me **when and only when I lack sufficient capacity to make or communicate a choice regarding a healthcare decision** as verified by my attending physician. My agent may not delegate the authority to make decisions.

**Appointment of Healthcare Agent (“Agent”)**

I appoint the following agent:

Name: \_\_\_\_\_ Relationship: \_\_\_\_\_

Address: \_\_\_\_\_  
\_\_\_\_\_

Telephone Number: Home \_\_\_\_\_ Work \_\_\_\_\_

Email: \_\_\_\_\_

Alternate agent (to be contacted if the appointed agent is unable to serve):

Name: \_\_\_\_\_ Relationship: \_\_\_\_\_

Telephone Number: Home \_\_\_\_\_ Work \_\_\_\_\_

Email: \_\_\_\_\_

**I understand that if I do not name an agent, my healthcare providers will ask my family or others who may know my preferences and values for help in determining my wishes for treatment.**

\_\_\_\_\_ (*initial*) I do not wish to appoint an agent.

## Part II - Healthcare Treatment Instructions (Living Will)

The following healthcare treatment instructions exercise my right to make my own healthcare decisions. These instructions are intended to provide clear and convincing evidence of my wishes, and are to be followed only when I lack the ability to understand, make or communicate healthcare decisions for myself. Further, these wishes are only intended to apply if I am in a **state of permanent unconsciousness or have an end-stage medical condition** as verified by my attending physician.

In general, I wish to both live as long as possible and avoid pain and suffering. However, I understand that in some situations, choosing between these two goals may be necessary. If I am in a situation where such a choice is needed:

### Overall Goals of Care

  X   I want my healthcare providers to treat me by helping to relieve my pain and suffering, even if that means that I may not live as long.

*If you prefer to choose a different overall goal of care, cross out the lines above and place your initials by one of the other options below:*

       I want my healthcare providers to treat me by helping me to live as long as possible, even if that means that I may have more pain or suffering.

**OR**

       I do not want to specify one of the above goals. My agent, with consultation from my healthcare provider, may direct the overall goals of my care based on his or her assessment of my preferences and values or best interests.

In addition, I want my healthcare providers and agent to focus on the following goals (optional):

---

---

## Specific Procedures

These are my specific requests regarding life-prolonging procedures, in addition to requests I may write in at the end of this section.

### 1. Cardiopulmonary resuscitation (CPR)

I do not want cardiopulmonary resuscitation (CPR) to be performed on me if my heart stops beating, even if performing CPR might prolong my life.

*If you prefer to choose a different option, cross out the lines above and place your initials by one of the other options below:*

I request cardiopulmonary resuscitation (CPR) if my heart stops beating, even if performing CPR may increase my pain or suffering.

OR

I do not wish to specify one of these options. My agent, with consultation from my healthcare provider, may make any decisions about cardiopulmonary resuscitation (CPR) for me based on his or her assessment of my preferences and values or best interests.

### 2. Mechanical ventilator (breathing machine) use

I do not want to be placed on a mechanical ventilator even if it might prolong my life. If I am unable to breathe on my own, I would prefer care directed towards relief of pain and suffering.

*If you prefer to choose a different option, cross out the lines above and place your initials by one of the other options below:*

I wish to be placed on a mechanical ventilator (breathing machine) if it may prolong my life, even if it may also increase my pain or suffering.

OR

I do not wish to specify one of these options. My agent, with consultation from my healthcare provider, may make any decisions about mechanical ventilator use for me based on his or her assessment of my preferences and values or best interests.

### 3. Dialysis (kidney filtration by machine)

I do not want dialysis to be performed on me, even if dialysis might prolong my life. If I was on dialysis before I became permanently unconscious or developed an end-stage medical condition, I want dialysis to be stopped.

*If you prefer to choose a different option, cross out the lines above and place your initials by one of the other options below:*

I request dialysis if it may prolong my life, even if it may also increase my pain or suffering. This includes continuing dialysis if I was on it before I became permanently unconscious or developed an end-stage medical condition.

OR

I do not wish to specify one of these options. My agent, with consultation from my healthcare provider, may make decisions about the use of dialysis for me based on his or her assessment of my preferences and values or best interests.

**4. Feeding tube insertion for artificial nutrition and hydration**

I do not want to have a feeding tube inserted or used for artificial nutrition and hydration.

*If you prefer to choose a different option, cross out the lines above and place your initials by one of the other options below:*

I request feeding tube insertion and use for artificial nutrition and hydration if I cannot eat or drink.

**OR**

I do not wish to specify one of these options. I understand that if I do not clearly express my preferences, my agent will presume that I want artificial nutrition and hydration.

In addition, I make the following requests regarding whether or not to use specific therapies:

---

---

---

**Care on hospital discharge if I am in an end-stage medical condition**

These are my requests about how I wish to be cared for if I am in a hospital, my doctors say I no longer need to be in the hospital, but I cannot communicate and my doctors do not expect that to change.

I want to be sent to my home if possible, or otherwise to a facility near my home, to receive care focused on keeping me as comfortable as possible rather than on prolonging my life. If my condition worsens, I do not want to return to a hospital again.

*If you prefer to choose a different option, cross out the lines above and place your initials by one of the other options below:*

I want to be sent to my home if possible, or otherwise to a facility near my home, to receive care focused on keeping me alive as long as possible. If my condition worsens, I want to return to the hospital if that may prolong my life.

**OR**

I do not wish to specify one of these options. I understand that if I do not express my preferences, my agent, with consultation from my health care provider, will make this decision for me based on his or her assessment of my preferences and values or best interests.

**Agent’s Use of Instructions (Initial one option only)**

I want the preferences I have expressed in this Living Will to be strictly followed by my agent.

**OR**

I want the preferences I have expressed in this Living Will to serve as a general guide for my agent. My agent will have final say about all decisions, and may override these instructions.

Please indicate any exceptions to the above – that is, instructions that may not be overridden:

---

---

If I did not appoint an agent, these instructions shall be followed.

**Legal Protection**

Pennsylvania law protects my healthcare agent and healthcare providers from any legal liability for their good faith actions in following my wishes as expressed in this form or in complying with my healthcare agent's direction. On behalf of myself, my executors and heirs, I further hold my healthcare agent and my healthcare providers harmless and indemnify them against any claim for their good faith actions in recognizing my healthcare agent's authority or in following my treatment instructions.

Having carefully read this document, I have signed it this \_\_\_\_ day of \_\_\_\_\_, 20\_\_, revoking all previous healthcare powers of attorney and healthcare treatment instructions.

**SIGNED:** \_\_\_\_\_  
(SIGN FULL NAME HERE)

*Two witnesses at least 18 years of age are required by Pennsylvania law and should witness your signature in each other's presence. A person who signs this document on behalf of and at the direction of a principal may not be a witness. (It is preferable if the witnesses are not your heirs, nor your creditors, nor employed by any of your healthcare providers.)*

WITNESS: \_\_\_\_\_

WITNESS: \_\_\_\_\_



**Life extending default advance directive**

**Part I – Durable Healthcare Power of Attorney**

I, \_\_\_\_\_ of \_\_\_\_\_ County, \_\_\_\_\_ (State), appoint the person named below to be my agent to make health decisions for me **when and only when I lack sufficient capacity to make or communicate a choice regarding a healthcare decision** as verified by my attending physician. My agent may not delegate the authority to make decisions.

**Appointment of Healthcare Agent (“Agent”)**

I appoint the following agent:

Name: \_\_\_\_\_ Relationship: \_\_\_\_\_

Address: \_\_\_\_\_  
\_\_\_\_\_

Telephone Number: Home \_\_\_\_\_ Work \_\_\_\_\_

Email: \_\_\_\_\_

Alternate agent (to be contacted if the appointed agent is unable to serve):

Name: \_\_\_\_\_ Relationship: \_\_\_\_\_

Telephone Number: Home \_\_\_\_\_ Work \_\_\_\_\_

Email: \_\_\_\_\_

**I understand that if I do not name an agent, my healthcare providers will ask my family or others who may know my preferences and values for help in determining my wishes for treatment.**

\_\_\_\_\_ (*initial*) I do not wish to appoint an agent.

**Part II - Healthcare Treatment Instructions (Living Will)**

The following healthcare treatment instructions exercise my right to make my own healthcare decisions. These instructions are intended to provide clear and convincing evidence of my wishes, and are to be followed only when I lack the ability to understand, make or communicate healthcare decisions for myself. Further, these wishes are only intended to apply if I am in a **state of permanent unconsciousness or have an end-stage medical condition** as verified by my attending physician.

In general, I wish to both live as long as possible and avoid pain and suffering. However, I understand that in some situations, choosing between these two goals may be necessary. If I am in a situation where such a choice is needed:

**Overall Goals of Care**

  X   I want my healthcare providers to treat me by helping me to live as long as possible, even if that means that I may have more pain or suffering.

*If you prefer to choose a different overall goal of care, cross out the lines above and place your initials by one of the other options below:*

       I want my healthcare providers to treat me by helping to relieve my pain and suffering, even if that means that I may not live as long.

**OR**

       I do not want to specify one of the above goals. My agent, with consultation from my healthcare provider, may direct the overall goals of my care based on his or her assessment of my preferences and values or best interests.

In addition, I want my healthcare providers and agent to focus on the following goals (optional):

---

---

## Specific Procedures

These are my specific requests regarding life-prolonging procedures, in addition to requests I may write in at the end of this section.

### 1. Cardiopulmonary resuscitation (CPR)

I request cardiopulmonary resuscitation (CPR) if my heart stops beating, even if performing CPR may increase my pain or suffering.

*If you prefer to choose a different option, cross out the lines above and place your initials by one of the other options below:*

I do not want cardiopulmonary resuscitation (CPR) to be performed on me if my heart stops beating, even if performing CPR might prolong my life.

**OR**

I do not wish to specify one of these options. My agent, with consultation from my healthcare provider, may make any decisions about cardiopulmonary resuscitation (CPR) for me based on his or her assessment of my preferences and values or best interests.

### 2. Mechanical ventilator (breathing machine) use

I wish to be placed on a mechanical ventilator (breathing machine) if it may prolong my life, even if it may also increase my pain or suffering.

*If you prefer to choose a different option, cross out the lines above and place your initials by one of the other options below:*

I do not want to be placed on a mechanical ventilator even if it might prolong my life. If I am unable to breathe on my own, I would prefer care directed towards relief of pain and suffering.

**OR**

I do not wish to specify one of these options. My agent, with consultation from my healthcare provider, may make any decisions about mechanical ventilator use for me based on his or her assessment of my preferences and values or best interests.

### 3. Dialysis (kidney filtration by machine)

I request dialysis if it may prolong my life, even if it may also increase my pain or suffering. This includes continuing dialysis if I was on it before I became permanently unconscious or developed an end-stage medical condition.

*If you prefer to choose a different option, cross out the lines above and place your initials by one of the other options below:*

I do not want dialysis to be performed on me, even if dialysis might prolong my life. If I was on dialysis before I became permanently unconscious or developed an end-stage medical condition, I want dialysis to be stopped.

**OR**

I do not wish to specify one of these options. My agent, with consultation from my healthcare provider, may make decisions about the use of dialysis for me based on his or her assessment of my preferences and values or best interests.

**4. Feeding tube insertion for artificial nutrition and hydration**

I request feeding tube insertion and use for artificial nutrition and hydration if I cannot eat or drink

*If you prefer to choose a different option, cross out the lines above and place your initials by one of the other options below:*

I do not want to have a feeding tube inserted or used for artificial nutrition and hydration.

**OR**

I do not wish to specify one of these options. I understand that if I do not clearly express my preferences, my agent will presume that I want artificial nutrition and hydration.

In addition, I make the following requests regarding whether or not to use specific therapies:

---

---

---

**Care on hospital discharge if I am in an end-stage medical condition**

These are my requests about how I wish to be cared for if I am in a hospital, my doctors say I no longer need to be in the hospital, but I cannot communicate and my doctors do not expect that to change.

I want to be sent to my home if possible, or otherwise to a facility near my home, to receive care focused on keeping me alive as long as possible. If my condition worsens, I want to return to the hospital if that may prolong my life.

*If you prefer to choose a different option, cross out the lines above and place your initials by one of the other options below:*

I want to be sent to my home if possible, or otherwise to a facility near my home, to receive care focused on keeping me as comfortable as possible rather than on prolonging my life. If my condition worsens, I do not want to return to a hospital again.

**OR**

I do not wish to specify one of these options. I understand that if I do not express my preferences, my agent, with consultation from my health care provider, will make this decision for me based on his or her assessment of my preferences and values or best interests.

**Agent’s Use of Instructions (Initial one option only)**

I want the preferences I have expressed in this Living Will to be strictly followed by my agent.

**OR**

I want the preferences I have expressed in this Living Will to serve as a general guide for my agent. My agent will have final say about all decisions, and may override these instructions.

Please indicate any exceptions to the above – that is, instructions that may not be overridden:

---

---

If I did not appoint an agent, these instructions shall be followed.

**Legal Protection**

Pennsylvania law protects my healthcare agent and healthcare providers from any legal liability for their good faith actions in following my wishes as expressed in this form or in complying with my healthcare agent's direction. On behalf of myself, my executors and heirs, I further hold my healthcare agent and my healthcare providers harmless and indemnify them against any claim for their good faith actions in recognizing my healthcare agent's authority or in following my treatment instructions.

Having carefully read this document, I have signed it this \_\_\_\_ day of \_\_\_\_\_, 20\_\_, revoking all previous healthcare powers of attorney and healthcare treatment instructions.

**SIGNED:** \_\_\_\_\_  
(SIGN FULL NAME HERE)

*Two witnesses at least 18 years of age are required by Pennsylvania law and should witness your signature in each other's presence. A person who signs this document on behalf of and at the direction of a principal may not be a witness. (It is preferable if the witnesses are not your heirs, nor your creditors, nor employed by any of your healthcare providers.)*

WITNESS: \_\_\_\_\_

WITNESS: \_\_\_\_\_

**eTable 1.** Differences Among the 3 Versions of the Advance Directive

|                                                                           | <b>Standard AD</b>                                                                                                                                                                                                             | <b>Comfort-default AD</b>                                                                                                                                                                                                                                                                                                               | <b>Life-extension default AD</b>                                                                                                                                                                                                                                                                                                        |
|---------------------------------------------------------------------------|--------------------------------------------------------------------------------------------------------------------------------------------------------------------------------------------------------------------------------|-----------------------------------------------------------------------------------------------------------------------------------------------------------------------------------------------------------------------------------------------------------------------------------------------------------------------------------------|-----------------------------------------------------------------------------------------------------------------------------------------------------------------------------------------------------------------------------------------------------------------------------------------------------------------------------------------|
| Overall goal of care                                                      | <ul style="list-style-type: none"> <li>Overall care focused on comfort and overall care focused on life extension presented in random order, followed by preference not to choose</li> <li>No option is preselected</li> </ul> | <ul style="list-style-type: none"> <li>Overall care focused on comfort presented first and preselected</li> <li>Overall care focused on life extension and then preference not to choose presented next</li> <li>Patient instructed to cross out preselected option and initial one of the other options if they prefer</li> </ul>      | <ul style="list-style-type: none"> <li>Overall care focused on life extension presented first and preselected</li> <li>Overall care focused on comfort and then preference not to choose presented next</li> <li>Patient instructed to cross out preselected option and initial one of the other options if they prefer</li> </ul>      |
| Choices regarding CPR, mechanical ventilation, feeding tube, and dialysis | <ul style="list-style-type: none"> <li>Choices to receive and forgo each of 4 life-support interventions* presented in random order, followed by preference not to choose</li> <li>No options are preselected</li> </ul>       | <ul style="list-style-type: none"> <li>Choices to forgo each of 4 life-support interventions presented first and preselected</li> <li>Choices to receive each of 4 life-support interventions presented next</li> <li>Patient instructed to cross out preselected option and initial one of the other options if they prefer</li> </ul> | <ul style="list-style-type: none"> <li>Choices to receive each of 4 life-support interventions presented first and preselected</li> <li>Choices to forgo each of 4 life-support interventions presented next</li> <li>Patient instructed to cross out preselected option and initial one of the other options if they prefer</li> </ul> |

**eTable 2.** Comparison of Patients Who Were and Were Not in the Per-Protocol Sample

|                                          | Per-protocol (n=264) | Not in per-protocol (n=228) | p-value |
|------------------------------------------|----------------------|-----------------------------|---------|
| <b>Age (mean (SD))</b>                   | 62.45 (10.87)        | 62.21 (11.13)               | 0.810   |
| <b>Gender (%)</b>                        |                      |                             | 0.489   |
| Male                                     | 154 (58.3)           | 125 (54.8)                  |         |
| Female                                   | 110 (41.7)           | 103 (45.2)                  |         |
| <b>Race (%)</b>                          |                      |                             | 0.297   |
| White or Caucasian                       | 193 (73.1)           | 154 (67.5)                  |         |
| Black or African American                | 62 (23.5)            | 60 (26.3)                   |         |
| Other                                    | 8 (3.0)              | 12 (5.3)                    |         |
| Missing/Unknown                          | 1 (0.4)              | 2 (0.9)                     |         |
| <b>Ethnicity (%)</b>                     |                      |                             | 1       |
| Not Hispanic/ Latino                     | 229 (86.7)           | 198 (86.8)                  |         |
| Hispanic/ Latino                         | 4 (1.5)              | 4 (1.8)                     |         |
| Missing/ Unknown                         | 31 (11.7)            | 26 (11.4)                   |         |
| <b>Marital status (%)</b>                |                      |                             | 0.535   |
| Currently Married or Living with Partner | 177 (67.0)           | 138 (60.5)                  |         |
| Divorced/Separated                       | 35 (13.3)            | 38 (16.7)                   |         |
| Never married                            | 34 (12.9)            | 34 (14.9)                   |         |
| Widowed or Widower                       | 16 (6.1)             | 15 (6.6)                    |         |
| Missing                                  | 2 (0.8)              | 3 (1.3)                     |         |
| <b>Education (%)</b>                     |                      |                             | 0.968   |
| Less than high school                    | 14 (5.3)             | 11 (4.8)                    |         |
| High school/ GED                         | 80 (30.3)            | 70 (30.7)                   |         |
| Some college                             | 66 (25.0)            | 51 (22.4)                   |         |
| College degree                           | 60 (22.7)            | 55 (24.1)                   |         |
| Post-college degree                      | 41 (15.5)            | 37 (16.2)                   |         |
| Missing                                  | 3 (1.1)              | 4 (1.8)                     |         |
| <b>Income (%)</b>                        |                      |                             | 0.747   |
| Less than \$30,000                       | 65 (24.6)            | 63 (27.6)                   |         |
| \$30,000-\$69,999                        | 99 (37.5)            | 75 (32.9)                   |         |
| \$70,000-\$99,999                        | 39 (14.8)            | 32 (14.0)                   |         |
| \$100,000 and over                       | 54 (20.5)            | 42 (18.4)                   |         |
| Missing                                  | 7 (2.7)              | 16 (7.0)                    |         |
| <b>Religion (%)</b>                      |                      |                             | 0.175   |
| Catholic                                 | 104 (39.4)           | 68 (29.8)                   |         |
| Protestant                               | 91 (34.5)            | 84 (36.8)                   |         |
| Other Christian                          | 25 (9.5)             | 23 (10.1)                   |         |
| Jewish                                   | 8 (3.0)              | 11 (4.8)                    |         |
| Other faiths                             | 5 (1.9)              | 11 (4.8)                    |         |
| Unaffiliated                             | 24 (9.1)             | 21 (9.2)                    |         |

**eTable 2.** Comparison of Patients Who Were and Were Not in the Per-Protocol Sample (continued)

|                                       | <b>Per-protocol (n=264)</b> | <b>Not in per-protocol (n=228)</b> | <b>p-value</b> |
|---------------------------------------|-----------------------------|------------------------------------|----------------|
| Missing                               | 7 (2.7)                     | 10 (4.4)                           |                |
| <b>Diagnosis (%)</b>                  |                             |                                    | 0.657          |
| Cancer                                | 191 (72.3)                  | 172 (75.4)                         |                |
| COPD and other incurable lung disease | 26 (9.8)                    | 19 (8.3)                           |                |
| End-stage renal disease               | 16 (6.1)                    | 18 (7.9)                           |                |
| Congestive heart failure              | 7 (2.7)                     | 4 (1.8)                            |                |
| Amyotrophic Lateral Sclerosis         | 24 (9.1)                    | 15 (6.6)                           |                |
| <b>AD Group (%)</b>                   |                             |                                    | 0.618          |
| Comfort                               | 85 (32.2)                   | 83 (36.4)                          |                |
| Standard                              | 91 (34.5)                   | 74 (32.5)                          |                |
| Life Extending                        | 88 (33.3)                   | 71 (31.1)                          |                |



**eTable 3.** Changes to Choices for Goals of Care and for Life Support at Debriefing and During Follow-up

| Changed at debrief (n=264) <sup>a</sup> | Comfort AD (n=85) |                 | Standard AD (n=91) |                 | Life Extending AD (n=88) |                 | Total |
|-----------------------------------------|-------------------|-----------------|--------------------|-----------------|--------------------------|-----------------|-------|
|                                         | More Aggressive   | Less Aggressive | More Aggressive    | Less Aggressive | More Aggressive          | Less Aggressive |       |
| Goal of care                            | 1                 | 0               | 0                  | 0               | 0                        | 0               | 1     |
| CPR                                     | 2                 | 1               | 0                  | 0               | 0                        | 0               | 3     |
| Mechanical ventilation                  | 4                 | 1               | 2                  | 0               | 1                        | 0               | 8     |
| Dialysis                                | 3                 | 1               | 2                  | 1               | 0                        | 1               | 8     |
| Feeding tube                            | 3                 | 1               | 1                  | 2               | 2                        | 1               | 10    |
| Changed at later follow-up (n=240)      | Comfort AD (n=78) |                 | Standard AD (n=82) |                 | Life Extending AD (n=80) |                 | Total |
|                                         | More Aggressive   | Less Aggressive | More Aggressive    | Less Aggressive | More Aggressive          | Less Aggressive |       |
| Goal of care                            | 0                 | 0               | 0                  | 1               | 0                        | 1               | 2     |
| CPR                                     | 3                 | 0               | 0                  | 1               | 0                        | 1               | 5     |
| Mechanical ventilation                  | 0                 | 0               | 2                  | 2               | 0                        | 1               | 5     |
| Dialysis                                | 2                 | 0               | 1                  | 2               | 0                        | 0               | 5     |
| Feeding tube                            | 0                 | 0               | 0                  | 2               | 0                        | 4               | 6     |

<sup>a</sup> 264 patients were debriefed

For goal of care, changes to more aggressive care include from comfort-oriented goal to not specifying or life-extension goal, or from not specifying to life-extension goal. Changes to less aggressive care include from life-extension goal to either not specifying or comfort-oriented goal, or from not specifying to comfort-oriented goal.

For the four forms of life support, changes to more aggressive care include from forgoing to not specifying or to receiving, or from not specifying to receiving. Changes to less aggressive care include from receiving to either not specifying or forgoing, or from not specifying to forgoing.

**eTable 4.** Comparison of Patients Who Did and Did Not Provide Valid Social Security Numbers

|                                          | <b>Valid SSN (n=437)</b> | <b>No valid SSN (n=55)</b> | <b>p-value</b> |
|------------------------------------------|--------------------------|----------------------------|----------------|
| <b>Age (mean (SD))</b>                   | 62.34 (10.64)            | 62.40 (13.48)              | 0.968          |
| <b>Gender (%)</b>                        |                          |                            | 0.842          |
| Male                                     | 249 (57.0)               | 30 (54.5)                  |                |
| Female                                   | 188 (43.0)               | 25 (45.5)                  |                |
| <b>Race (%)</b>                          |                          |                            | 0.109          |
| White or Caucasian                       | 309 (70.7)               | 38 (69.1)                  |                |
| Black or African American                | 111 (25.4)               | 11 (20.0)                  |                |
| Other                                    | 15 (3.4)                 | 5 (9.1)                    |                |
| Missing/Unknown                          | 2 (0.5)                  | 1 (1.8)                    |                |
| <b>Ethnicity (%)</b>                     |                          |                            | 0.651          |
| Not Hispanic or Latino                   | 378 (86.5)               | 49 (89.1)                  |                |
| Hispanic/ Latino                         | 8 (1.8)                  | 0 (0.0)                    |                |
| Missing / Unknown                        | 51 (11.7)                | 6 (10.9)                   |                |
| <b>Marital status (%)</b>                |                          |                            | 0.981          |
| Currently Married or Living with Partner | 280 (64.1)               | 35 (63.6)                  |                |
| Divorced/Separated                       | 66 (15.1)                | 7 (12.7)                   |                |
| Never married                            | 60 (13.7)                | 8 (14.5)                   |                |
| Widowed or Widower                       | 28 (6.4)                 | 3 (5.5)                    |                |
| Missing                                  | 3 (0.7)                  | 2 (3.6)                    |                |
| <b>Education (%)</b>                     |                          |                            | 0.016          |
| Less than high school                    | 24 (5.5)                 | 1 (1.8)                    |                |
| High school/ GED                         | 137 (31.4)               | 13 (23.6)                  |                |
| Some college                             | 109 (24.9)               | 8 (14.5)                   |                |
| College degree                           | 101 (23.1)               | 14 (25.5)                  |                |
| Post-college degree                      | 61 (14.0)                | 17 (30.9)                  |                |
| Missing                                  | 5 (1.1)                  | 2 (3.6)                    |                |
| <b>Income (%)</b>                        |                          |                            | 0.003          |
| Less than 30000                          | 119 (27.2)               | 9 (16.4)                   |                |
| 30000-69999                              | 157 (35.9)               | 17 (30.9)                  |                |
| 70000-99999                              | 65 (14.9)                | 6 (10.9)                   |                |
| 100000 and over                          | 75 (17.2)                | 21 (38.2)                  |                |
| Missing                                  | 21 (4.8)                 | 2 (3.6)                    |                |
| <b>Religion (%)</b>                      |                          |                            | 0.037          |
| Catholic                                 | 152 (34.8)               | 20 (36.4)                  |                |
| Protestant                               | 163 (37.3)               | 12 (21.8)                  |                |
| Other Christian                          | 44 (10.1)                | 4 (7.3)                    |                |
| Jewish                                   | 14 (3.2)                 | 5 (9.1)                    |                |
| Other faiths                             | 13 (3.0)                 | 3 (5.5)                    |                |
| Unaffiliated                             | 37 (8.5)                 | 8 (14.5)                   |                |

**eTable 4.** Comparison of Patients Who Did and Did Not Provide Valid Social Security Numbers (continued)

|                                       | <b>Valid SSN (n=437)</b> | <b>No valid SSN (n=55)</b> | <b>p-value</b> |
|---------------------------------------|--------------------------|----------------------------|----------------|
| Missing                               | 14 (3.2)                 | 3 (5.5)                    |                |
| <b>Diagnosis (%)</b>                  |                          |                            | 0.285          |
| Gastro-Intestinal cancer              | 141 (32.3)               | 20 (36.4)                  |                |
| Genitourinary cancer                  | 81 (18.5)                | 11 (20.0)                  |                |
| Lung cancer                           | 70 (16.0)                | 10 (18.1)                  |                |
| Breast cancer                         | 27 (6.2)                 | 3 (5.5)                    |                |
| COPD and other incurable lung disease | 44 (10.1)                | 1 (1.8)                    |                |
| End-stage renal disease               | 28 (6.4)                 | 6 (10.9)                   |                |
| Congestive heart failure              | 9 (2.1)                  | 2 (3.6)                    |                |
| Amyotrophic Lateral Sclerosis         | 37 (8.5)                 | 2 (3.6)                    |                |
| <b>AD Groups (%)</b>                  |                          |                            | 0.760          |
| Comfort AD                            | 148 (33.9)               | 20 (36.4)                  |                |
| Standard AD                           | 149 (34.1)               | 16 (29.1)                  |                |
| Life Extending AD                     | 140 (32.0)               | 19 (34.5)                  |                |

**eTable 5.** Regression Analysis of Hospital-Free Days, Measured Outcomes Only<sup>a</sup>

| <b>Variables</b>              | <b>Incident rate ratio<br/>(95% CI)</b> | <b>p-value</b> |
|-------------------------------|-----------------------------------------|----------------|
| Standard AD                   | reference                               |                |
| Standard AD:Comfort AD        | 1.05 (0.90-1.23)                        | 0.511          |
| Standard AD:Life Extending AD | 1.03 (0.88-1.20)                        | 0.716          |
| Age                           | 1 (0.99-1.01)                           | 0.922          |
| Gender (Female)               | 1.04 (0.92-1.18)                        | 0.543          |
| Race (Black)                  | 1 (0.86-1.16)                           | 0.984          |
| Diagnosis (Not cancer)        | 1.09 (0.94-1.26)                        | 0.252          |

<sup>a</sup> N = 437; Negative Binomial output with offset as eligible follow-up

Non-inferiority tests:

H0: Comfort/Standard  $\leq$  0.85

H1: Comfort/Standard  $>$  0.85

CI: (0.90, infinite), p value =  $<$ 0.001

From the CI we can see that the lower bound of CI is 0.90 (which is greater than 0.85), which means we can reject the null hypothesis. This is also evident from the p-value.

H0: Life Extending/ Standard  $\leq$  0.85

H1: Life Extending/Standard  $>$  0.85

CI: (0.88, infinite), p value =  $<$ 0.001

From the CI we can see that the lower bound of CI is 0.88 (which is greater than 0.85), which means we can reject the null hypothesis. This too is evident from the p-value.

\*Bonferroni correction has been applied to the non-inferiority tests

**eTable 6.** Regression Analysis of Hospital-Free Days, Missing Outcomes Imputed<sup>a,b</sup>

| <b>Variables</b>                                                                                                                                           | <b>Incident rate ratio<br/>(95% CI)</b> | <b>p-value</b> |
|------------------------------------------------------------------------------------------------------------------------------------------------------------|-----------------------------------------|----------------|
| Standard AD                                                                                                                                                | reference                               |                |
| Standard AD:Comfort AD                                                                                                                                     | 1.05 (0.91-1.22)                        | 0.521          |
| Standard AD:Life Extending AD                                                                                                                              | 1.03 (0.89-1.20)                        | 0.652          |
| Age                                                                                                                                                        | 1 (0.99-1.01)                           | 0.901          |
| Gender (Female)                                                                                                                                            | 1.04 (0.92-1.18)                        | 0.497          |
| Race (Black)                                                                                                                                               | 1.01 (0.88-1.16)                        | 0.903          |
| Diagnosis (Not cancer)                                                                                                                                     | 1.09 (0.95-1.25)                        | 0.227          |
| <sup>a</sup> N=492; Negative Binomial output (imputed data)                                                                                                |                                         |                |
| <sup>b</sup> Missing values imputed via model based multiple imputation approach, which uses chain of regression models. Implemented with R package 'mice' |                                         |                |

**eTable 7.** Complier Average Treatment Effect Analysis of Hospital-Free Days<sup>a</sup>

| <b>Comparison of Efficacy</b>                                                            | <b>Absolute difference in HFD (95% CI)<sup>b</sup></b> |
|------------------------------------------------------------------------------------------|--------------------------------------------------------|
| Comfort goal vs. non-comfort goal AD for those who would accept comfort goals            | 272.67 (-482.2 , 3217.3)                               |
| <sup>a</sup> Estimated proportion of compliers = 9.86%                                   |                                                        |
| <sup>b</sup> 95% CI built using conditional likelihood test which is robust for weak IVs |                                                        |

**eTable 8.** Regression Analysis of Receipt of at Least 1 Form of Life Support<sup>a</sup>

| <b>Variables</b>                                                 | <b>Odds ratio (95% CI)</b> | <b>p-value</b> |
|------------------------------------------------------------------|----------------------------|----------------|
| Comfort AD                                                       | 0.64 (0.3-1.33)            | 0.235          |
| Life Extending AD                                                | 0.72 (0.34-1.51)           | 0.388          |
| Age                                                              | 0.99 (0.96-1.02)           | 0.588          |
| Gender (Female)                                                  | 0.49 (0.25-0.93)           | 0.033          |
| Race (Black)                                                     | 3.76 (2.01-7.08)           | 0.000          |
| Diagnosis (Not cancer)                                           | 2.05 (1.08-3.86)           | 0.026          |
| <sup>a</sup> Logistic regression output; Standard AD = reference |                            |                |

**eTable 9.** Regression Analysis of Death in a Hospital vs Death Elsewhere or Alive<sup>a</sup>

| <b>Variables</b>                                            | <b>Odds ratio (95% CI)</b> | <b>p-value</b> |
|-------------------------------------------------------------|----------------------------|----------------|
| Comfort AD                                                  | 0.93 (0.87-1)              | 0.066          |
| Life Extending AD                                           | 0.95 (0.88-1.02)           | 0.154          |
| Age                                                         | 1 (1-1)                    | 0.831          |
| Race (Black)                                                | 1.03 (0.96-1.1)            | 0.479          |
| Diagnosis (Not cancer)                                      | 1.02 (0.95-1.09)           | 0.646          |
| <sup>a</sup> Logistic model output; Standard AD = reference |                            |                |



**eTable 10.** Distributions of Patients Whose Completed ADs Were Scanned in the Electronic Health Record

| <b>AD versions</b>       | <b>MITT sample (n=492)</b> | <b>Patients who completed ADs and were debriefed (n=264)</b> | <b>Patients who completed ADs, were debriefed, and had valid social security numbers</b> |
|--------------------------|----------------------------|--------------------------------------------------------------|------------------------------------------------------------------------------------------|
| <b>Comfort AD</b>        | 37.5 (63/168)              | 72.9 (62/85)                                                 | 35.7 (60/168)                                                                            |
| <b>Standard AD</b>       | 39.4 (65/165)              | 70.3 (64/91)                                                 | 36.4 (60/165)                                                                            |
| <b>Life extending AD</b> | 37.7 (60/159)              | 68.2 (60/88)                                                 | 37.1 (59/159)                                                                            |
| <b>P value</b>           | 0.928                      | 0.790                                                        | 0.987                                                                                    |

**eTable 11.** Choices and Outcomes Among Patients in the Per-Protocol Sample (n = 179)

|                                          | Treatment Arm                      |                                          |                         |                                |                                    |                                          |                         |
|------------------------------------------|------------------------------------|------------------------------------------|-------------------------|--------------------------------|------------------------------------|------------------------------------------|-------------------------|
|                                          | Comfort AD (n=60)                  |                                          |                         | Standard AD (n=60) (Reference) | Life-extending AD (n=59)           |                                          |                         |
| <b>Outcomes</b>                          | <i>Summary</i>                     | <i>Adjusted effect estimate (95% CI)</i> | <i>Adjusted p-value</i> | <i>Summary</i>                 | <i>Summary</i>                     | <i>Adjusted effect estimate (95% CI)</i> | <i>Adjusted p-value</i> |
| Comfort-oriented goal                    | 68.3%                              | Odds ratio= 2.41 (1.12, 5.23)            | 0.025                   | 48.3%                          | 27.1%                              | 0.40 (0.18, 0.89)                        | 0.024                   |
| Hospital-free days                       | Median (IQR) = 644 (360.2 - 880.8) | Incident rate = 1.19 (0.99, 1.42)        | 0.055                   | 517 (322 - 667.5)              | Median (IQR) = 614 (372.5 - 824.5) | 1.15 (0.96, 1.37)                        | 0.132                   |
| Number of hospital days                  | Median (IQR) = 3 (0 - 13)          | Incident rate = 1.14 (0.58, 2.24)        | 0.704                   | 7 (0 - 18)                     | Median (IQR) = 3 (0 - 8.5)         | 0.68 (0.34, 1.34)                        | 0.263                   |
| Receipt of any life-sustaining therapies | 10.0%                              | Odds ratio = 0.72 (0.19, 2.69)           | 0.630                   | 11.7%                          | 1.7%                               | 0.12 (0.13, 1.08)                        | 0.059                   |

**eTable 12.** Regression Analysis of McGill Quality of Life Score<sup>a,b</sup>

| <b>Variables</b>                                                                                                | <b>Estimate (95% CI)</b> | <b>p value</b> |
|-----------------------------------------------------------------------------------------------------------------|--------------------------|----------------|
| Comfort AD                                                                                                      | 0.11 (-0.85 - 1.07)      | 0.823          |
| Life Extending AD                                                                                               | -0.04 (-0.99 - 0.92)     | 0.937          |
| Age                                                                                                             | 0.03 (-0.01 - 0.06)      | 0.155          |
| Gender (Female)                                                                                                 | 0.22 (-0.60 - 1.04)      | 0.604          |
| Race (Black)                                                                                                    | 0.29 (-0.78 - 1.36)      | 0.595          |
| Education (College degree)                                                                                      | 0.26 (-0.57 - 1.09)      | 0.227          |
| Marital status (Not currently married)                                                                          | -0.60 (-1.6 - 0.38)      | 0.736          |
| Diagnosis (Not cancer)                                                                                          | 0.16 (-0.77 - 1.1)       | 0.539          |
| <sup>a</sup> N = 264 patients completing ADs; Ordinary Least Squares regression output; Standard AD = reference |                          |                |
| <sup>b</sup> Scores range from 0 to 10 and were reported for 247 patients and imputed for 17 patients           |                          |                |

eFigure 1. Flow of Patient Accrual and Protocol Completion

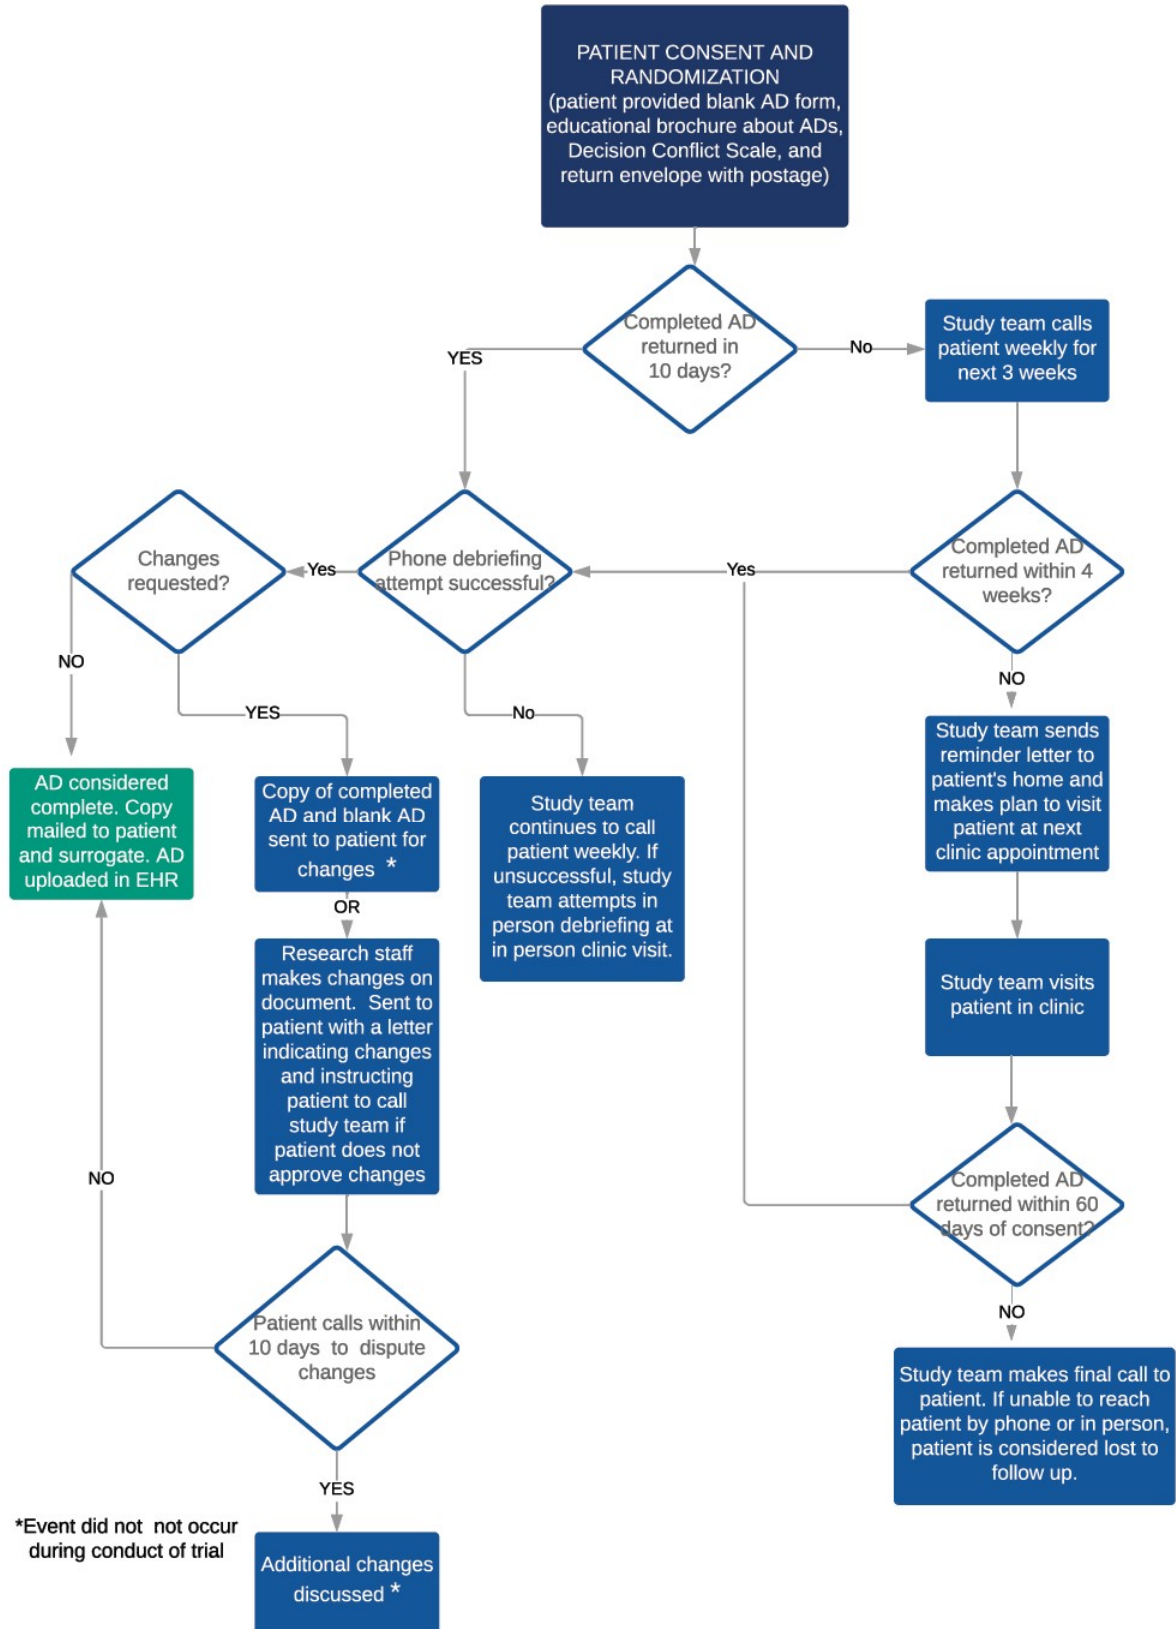

**eFigure 2.** Proportions of Patients Choosing to Forgo Each Form of Life Support by Trial Group, Per-Protocol Sample

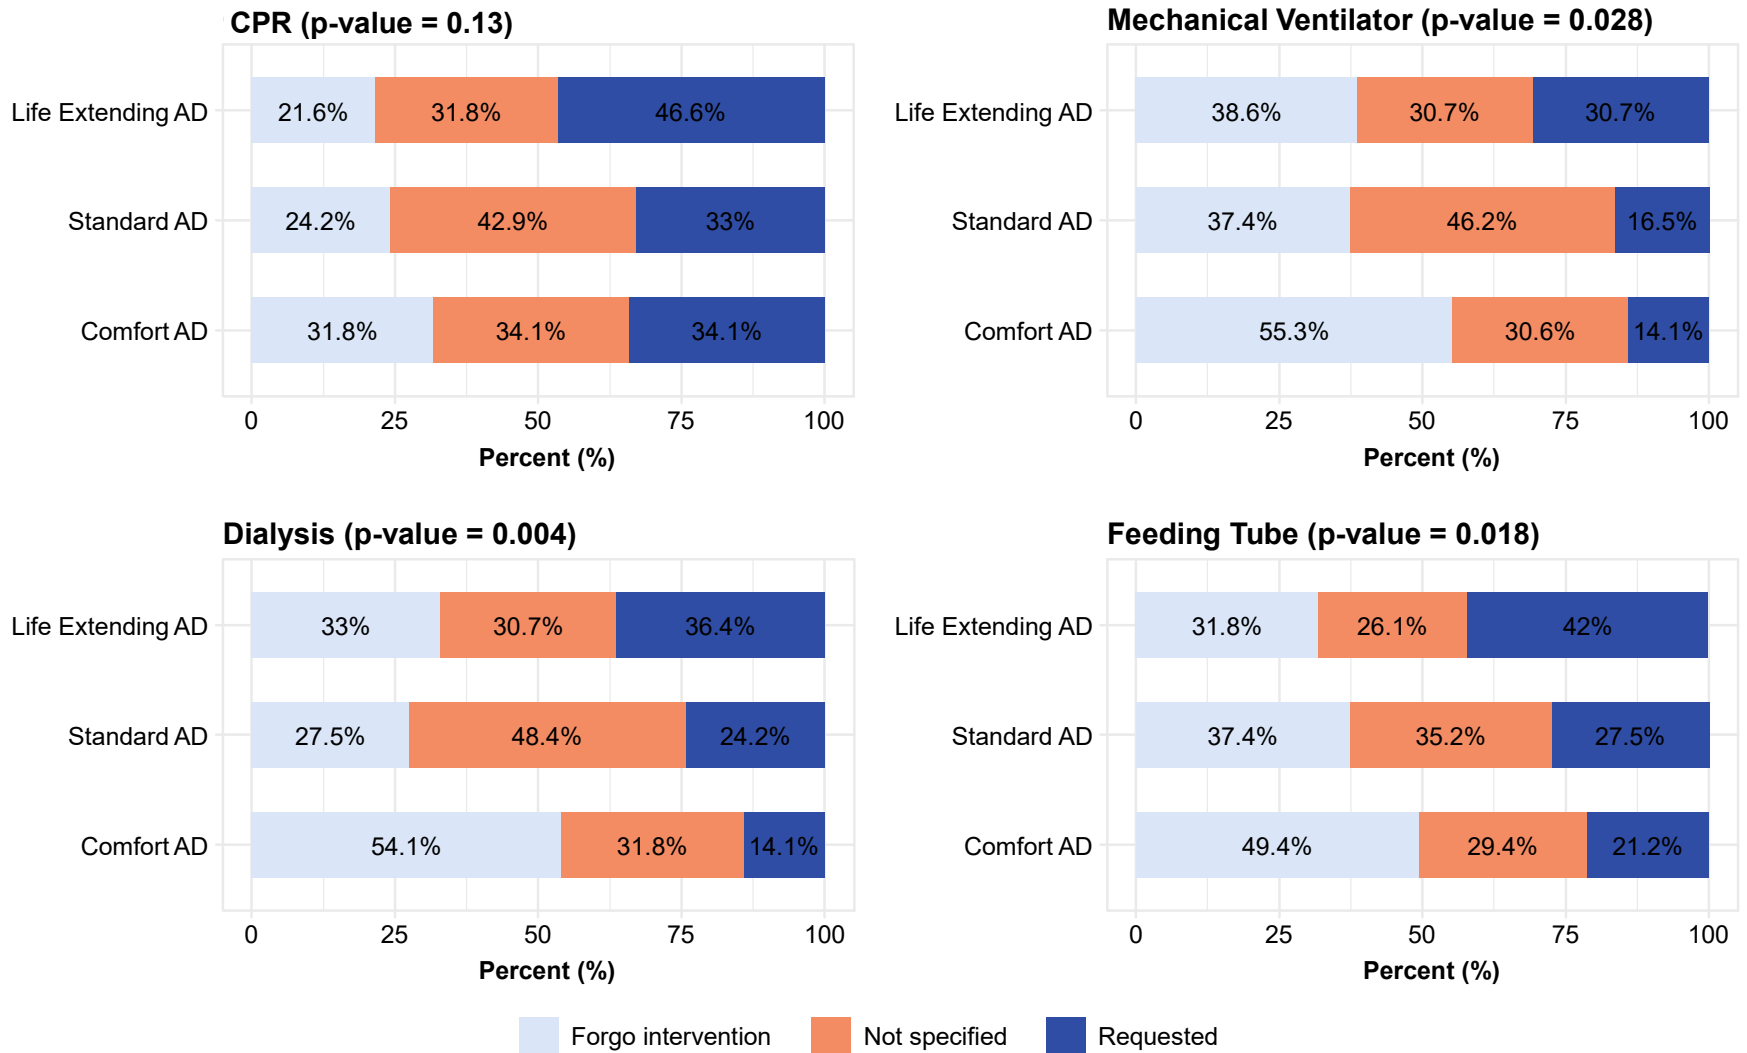

**eFigure 3.** Proportions of Patients Choosing to Forgo Each Form of Life Support by Trial Group, Modified Intention-to-Treat Sample

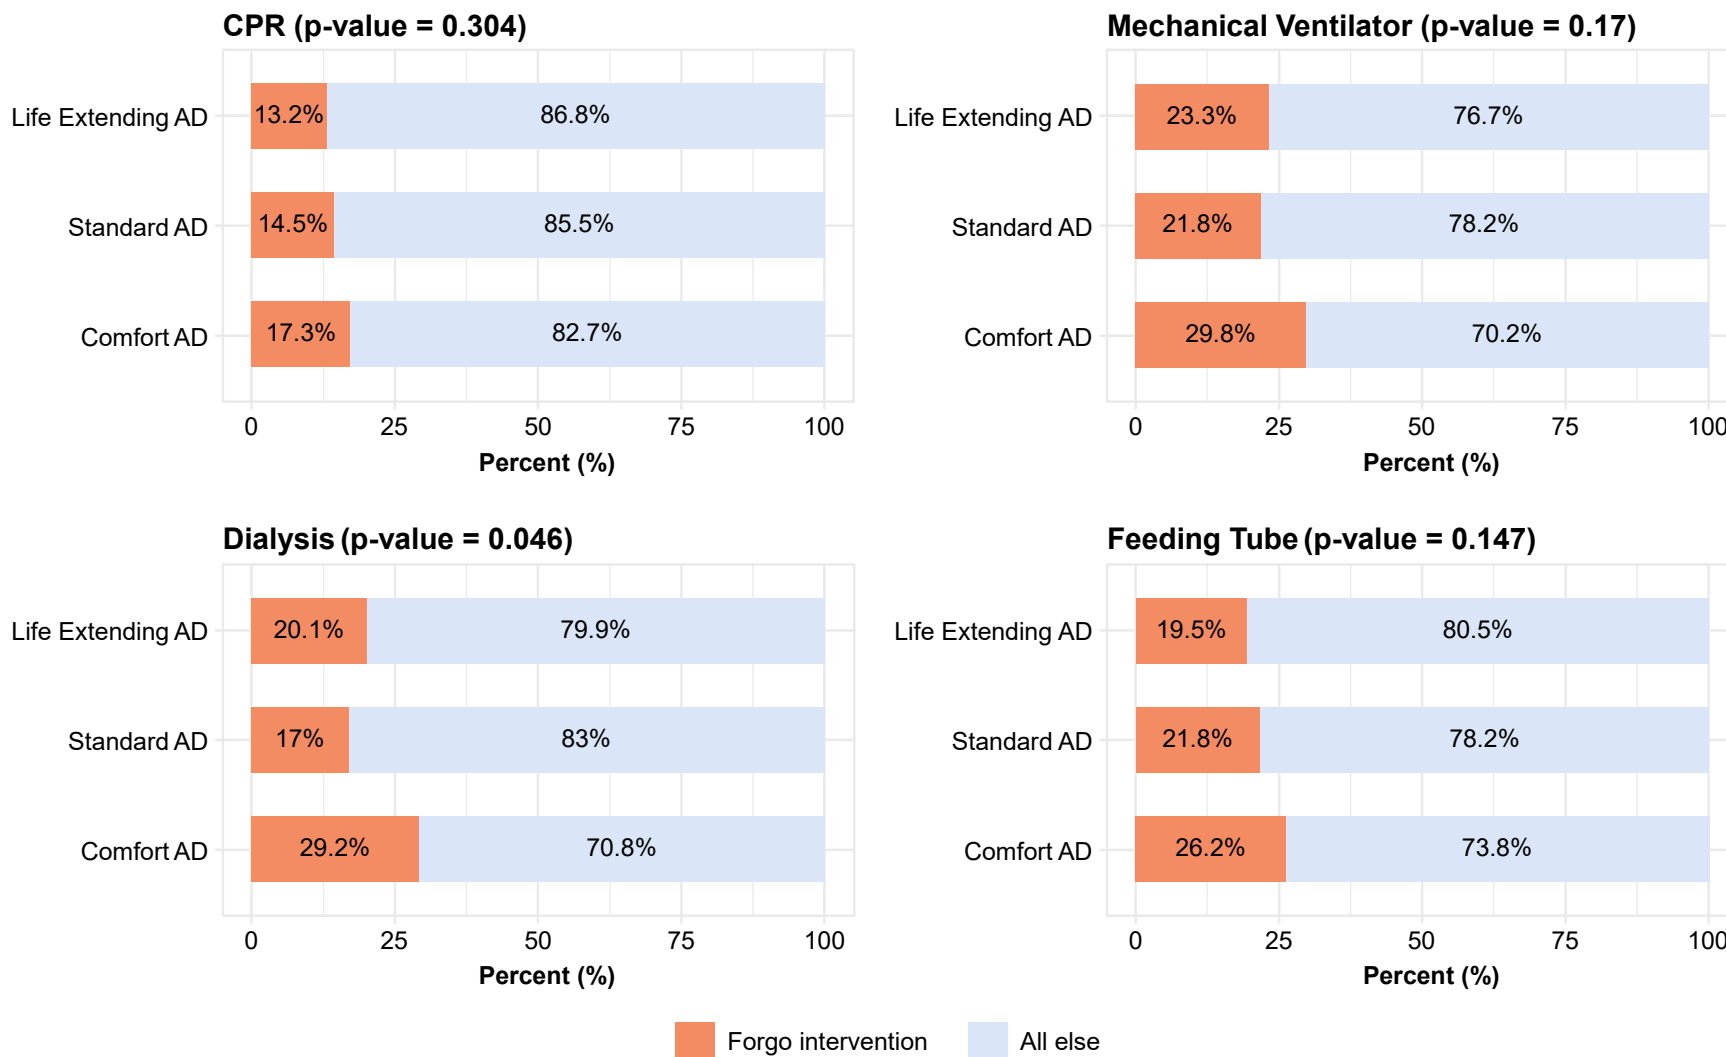

Supplement: NIHMS1595061-supplement-Supplement_2.pdf [file NIHMS1595061-supplement-Supplement_2.pdf]
