# Supplementary material
Source: PubMed Central journal article supplement (PMC7315782)
Supplement: NIHMS1595061-supplement-Supplement_3.pdf [file NIHMS1595061-supplement-Supplement_3.pdf]

## Data Sharing Statement

Halpern. Effect of Default Options in Advance Directives on Hospital-Free Days and Care Choices Among Seriously Ill Patients. *JAMA Network Open*. Published March 30, 2020.  
10.1001/jamanetworkopen.2020.1742

### Data

**Data available:** Yes

**Data types:** Deidentified participant data, Data dictionary

**How to access data:** [shalpern@upenn.edu](mailto:shalpern@upenn.edu)

**When available:** With publication

### Supporting Documents

**Document types:** Informed consent form

**How to access documents:** [shalpern@upenn.edu](mailto:shalpern@upenn.edu)

**When available:** With publication

### Additional Information

**Who can access the data:** researchers whose proposed use of the data has been approved

**Types of analyses:** for any scientifically valid purpose

**Mechanisms of data availability:** after approval of a proposal

**Any additional restrictions:** none
